# Supplementary material for: Population Genetic Structures of Puccinia striiformis f. sp. tritici in the Gansu-Ningxia Region and Hubei Province, China
Source: Genes (Basel). 2021 Oct 27;12(11):1712. doi: 10.3390/genes12111712 (PMC8618938; doi:10.3390/genes12111712)
Supplement: Supplementary file 1 [file genes-12-01712-s001.zip › Supplementary file 1.xlsx]

## Sheet: sheet 1
Table S1 The frequencies of all genotypes
Genotype name	Subpopulation	Frequency
g1	16NW	0.02
g2	16NW	0.007		Note: The highlighted genotypes represent the shared genotypes showed in Fig. 2
g4	16NW	0.04
g5	16NW	0.121
g6	16NW	0.007
g7	16NW	0.034
g8	16NW	0.141
g9	16NW	0.007
g12	16NW	0.007
g13	16NW	0.007
g15	16NW	0.007
g21	16NW	0.00671141
g22	16NW	0.00671141
g23	16NW	0.00671141
g24	16NW	0.00671141
g25	16NW	0.0201342
g26	16NW	0.00671141
g27	16NW	0.00671141
g28	16NW	0.0134228
g29	16NW	0.00671141
g30	16NW	0.00671141
g31	16NW	0.0268456
g32	16NW	0.00671141
g33	16NW	0.00671141
g34	16NW	0.0134228
g35	16NW	0.00671141
g36	16NW	0.00671141
g37	16NW	0.0134228
g38	16NW	0.00671141
g39	16NW	0.00671141
g40	16NW	0.00671141
g41	16NW	0.0201342
g42	16NW	0.00671141
g43	16NW	0.007
g44	16NW	0.007
g45	16NW	0.00671141
g46	16NW	0.00671141
g47	16NW	0.00671141
g48	16NW	0.00671141
g49	16NW	0.00671141
g50	16NW	0.00671141
g51	16NW	0.00671141
g52	16NW	0.00671141
g53	16NW	0.00671141
g54	16NW	0.00671141
g55	16NW	0.00671141
g56	16NW	0.00671141
g57	16NW	0.00671141
g58	16NW	0.00671141
g59	16NW	0.0469799
g60	16NW	0.00671141
g61	16NW	0.0134228
g62	16NW	0.00671141
g63	16NW	0.00671141
g64	16NW	0.00671141
g65	16NW	0.0134228
g66	16NW	0.00671141
g67	16NW	0.00671141
g68	16NW	0.00671141
g69	16NW	0.00671141
g70	16NW	0.00671141
g71	16NW	0.00671141
g72	16NW	0.0134228
g73	16NW	0.00671141
g74	16NW	0.00671141
g75	16NW	0.00671141
g76	16NW	0.0134228
g77	16NW	0.00671141
g78	16NW	0.00671141
g79	16NW	0.0134228
g80	16NW	0.00671141
g81	16NW	0.00671141
g82	16NW	0.00671141
g83	16NW	0.00671141
g84	16NW	0.00671141
g85	16NW	0.00671141
g86	16NW	0.00671141
g87	16NW	0.00671141
g88	16NW	0.00671141
g89	16NW	0.00671141
g90	16NW	0.00671141
g91	16NW	0.00671141
g92	16NW	0.00671141
g93	16NW	0.00671141
g94	16NW	0.00671141
g95	16NW	0.00671141
g96	16NW	0.00671141
g97	16NW	0.00671141
g98	16NW	0.00671141
g7	16SY	0.022
g10	16SY	0.022
g19	16SY	0.044
g20	16SY	0.511
g99	16SY	0.067
g100	16SY	0.0222222
g101	16SY	0.0222222
g102	16SY	0.0222222
g103	16SY	0.222222
g104	16SY	0.0222222
g105	16SY	0.0222222
g17	16XY	0.043
g10	16XY	0.064
g20	16XY	0.617
g99	16XY	0.043
g106	16XY	0.0212766
g107	16XY	0.0212766
g108	16XY	0.0212766
g109	16XY	0.0212766
g110	16XY	0.0212766
g111	16XY	0.0212766
g112	16XY	0.0212766
g113	16XY	0.0212766
g114	16XY	0.0212766
g115	16XY	0.0212766
g116	16XY	0.0212766
g19	16SZ	0.125
g20	16SZ	0.25
g99	16SZ	0.5
g117	16SZ	0.125
g1	17SY	0.028
g2	17SY	0.014
g4	17SY	0.014
g5	17SY	0.014
g6	17SY	0.014
g9	17SY	0.056
g10	17SY	0.042
g13	17SY	0.014
g15	17SY	0.014
g20	17SY	0.083
g17	17SY	0.014
g118	17SY	0.014
g119	17SY	0.0138889
g120	17SY	0.0138889
g121	17SY	0.0138889
g122	17SY	0.0138889
g123	17SY	0.0138889
g124	17SY	0.0138889
g125	17SY	0.0833333
g126	17SY	0.0555556
g127	17SY	0.0277778
g128	17SY	0.0138889
g129	17SY	0.0138889
g130	17SY	0.0138889
g131	17SY	0.0138889
g132	17SY	0.028
g133	17SY	0.0138889
g134	17SY	0.0138889
g135	17SY	0.0138889
g136	17SY	0.0138889
g137	17SY	0.0138889
g138	17SY	0.0138889
g139	17SY	0.0138889
g140	17SY	0.0138889
g141	17SY	0.0416667
g142	17SY	0.0138889
g143	17SY	0.0138889
g144	17SY	0.0138889
g145	17SY	0.0555556
g146	17SY	0.0138889
g147	17SY	0.0138889
g148	17SY	0.0555556
g149	17SY	0.0138889
g9	17XY	0.083
g12	17XY	0.042
g19	17XY	0.042
g20	17XY	0.292
g132	17XY	0.083
g150	17XY	0.042
g151	17XY	0.0416667
g152	17XY	0.0416667
g153	17XY	0.0416667
g154	17XY	0.0416667
g155	17XY	0.0416667
g156	17XY	0.125
g157	17XY	0.0833333
g1	17NW	0.159
g3	17NW	0.027
g8	17NW	0.31
g9	17NW	0.009
g11	17NW	0.009
g14	17NW	0.009
g16	17NW	0.009
g18	17NW	0.053
g150	17NW	0.009
g158	17NW	0.0265487
g159	17NW	0.00884956
g160	17NW	0.00884956
g161	17NW	0.0176991
g162	17NW	0.00884956
g163	17NW	0.00884956
g164	17NW	0.0530973
g165	17NW	0.0176991
g166	17NW	0.00884956
g167	17NW	0.00884956
g168	17NW	0.00884956
g169	17NW	0.00884956
g170	17NW	0.00884956
g171	17NW	0.00884956
g172	17NW	0.00884956
g173	17NW	0.00884956
g174	17NW	0.00884956
g175	17NW	0.00884956
g176	17NW	0.00884956
g177	17NW	0.00884956
g178	17NW	0.0176991
g179	17NW	0.00884956
g180	17NW	0.0176991
g181	17NW	0.0530973
g182	17NW	0.0176991
g8	18SY	0.067
g14	18SY	0.133
g183	18SY	0.133333
g184	18SY	0.0333333
g185	18SY	0.0333333
g186	18SY	0.233333
g187	18SY	0.0666667
g188	18SY	0.0333333
g189	18SY	0.0333333
g190	18SY	0.233333
g1	18XY	0.129
g4	18XY	0.157
g8	18XY	0.057
g3	18XY	0.043
g11	18XY	0.043
g14	18XY	0.043
g18	18XY	0.043
g118	18XY	0.014
g43	18XY	0.014
g191	18XY	0.0142857
g192	18XY	0.0142857
g193	18XY	0.0142857
g194	18XY	0.0142857
g195	18XY	0.0142857
g196	18XY	0.0142857
g197	18XY	0.0142857
g198	18XY	0.157143
g199	18XY	0.0142857
g200	18XY	0.0142857
g201	18XY	0.0142857
g202	18XY	0.014
g203	18XY	0.014
g204	18XY	0.0428571
g205	18XY	0.0142857
g206	18XY	0.0142857
g207	18XY	0.0142857
g16	18JM	0.556
g18	18JM	0.333
g208	18JM	0.111111
