# Supplementary material for: Population Genetic Structures of Puccinia striiformis f. sp. tritici in the Gansu-Ningxia Region and Hubei Province, China
Source: Genes (Basel). 2021 Oct 27;12(11):1712. doi: 10.3390/genes12111712 (PMC8618938; doi:10.3390/genes12111712)
Supplement: Supplementary file 1 [file genes-12-01712-s001.zip › Supplementary file 2.pdf]

Table S2. Bayesian assignments of *Puccinia striiformis* f. sp. *tritici* for 10 subpopulations collected from Hubei and the Gansu-Ningxia region of China from the 2016 fall to the 2018 spring

| Subpopulation | <sup>a</sup> Genetic group |        |        |               |
|---------------|----------------------------|--------|--------|---------------|
|               | G1 (%)                     | G2 (%) | G3 (%) | Admixture (%) |
| 16F-GN        | 10.42                      | 40.63  | 32.29  | 16.67         |
| 16F-HB-SY     | 0                          | 9.09   | 81.82  | 9.09          |
| 16F-HB-XY     | 0                          | 0      | 86.67  | 13.33         |
| 16F-HB-SZ     | 0                          | 0      | 100    | 0             |
| 17S-HB-SY     | 20.93                      | 16.28  | 30.23  | 32.56         |
| 17S-HB-XY     | 7.69                       | 0      | 76.92  | 15.38         |
| 17F-GN        | 17.39                      | 30.43  | 30.43  | 21.74         |
| 18S-HB-SY     | 60.00                      | 30.00  | 10.00  | 0             |
| 18S-HB-JM     | 0                          | 33.33  | 66.67  | 0             |
| 18S-HB-XY     | 26.92                      | 15.38  | 50.00  | 7.69          |

Note: <sup>a</sup>The percentages of isolates assigned into the G1, G2, and G3, corresponding to the blue, red and green groups in Fig 4 (C-E) with  $Q > 0.8$ , respectively. The admixture was the percentage of mixed isolates from G1, G2 and G3 (light gray group in Fig 4C, 4D, and 4E) with  $0.2 < Q < 0.8$ .
